# Supplementary material for: Comparative genomics of Lactobacillus crispatus suggests novel mechanisms for the competitive exclusion of Gardnerella vaginalis
Source: PubMed Central journal article supplement (PMC4300991; doi:10.1186/1471-2164-15-1070), 2014-12-05
Supplement: 12864_2014_6771_MOESM1_ESM.pdf [file 12864_2014_6771_MOESM1_ESM.pdf]

| Strain      | Accession               | Scaffolds | Genome size (Mb) | CDS  | Average CDS length | Comments                                                         | Reference                                                        |
|-------------|-------------------------|-----------|------------------|------|--------------------|------------------------------------------------------------------|------------------------------------------------------------------|
| 00703Bmash  | [GenBank:ADET000000000] | 16        | 1.57             | 1256 | 1083               | isolated from a BV patient undergoing metronidazole treatment ^  | Ahmed A <i>et al.</i> 2012                                       |
| 00703C2mash | [GenBank:ADEU000000000] | 22        | 1.55             | 1236 | 1080               | isolated from a BV patient undergoing metronidazole treatment ^  | Ahmed A <i>et al.</i> 2012                                       |
| 00703Dmash  | [GenBank:ADEV000000000] | 11        | 1.49             | 1166 | 1123               | isolated from a BV patient undergoing metronidazole treatment ^  | Ahmed A <i>et al.</i> 2012                                       |
| 0288E       | [GenBank:ADEN000000000] | 17        | 1.71             | 1356 | 1093               | clinical isolate, biotype 1                                      | Ahmed A <i>et al.</i> 2012                                       |
| 1400E       | [GenBank:ADER000000000] | 28        | 1.72             | 1383 | 1068               | clinical isolate, biotype 4                                      | Ahmed A <i>et al.</i> 2012                                       |
| 1500E       | [GenBank:ADES000000000] | 27        | 1.55             | 1215 | 1109               | clinical isolate, biotype 5                                      | Ahmed A <i>et al.</i> 2012                                       |
| 284V        | [GenBank:ADEL000000000] | 16        | 1.65             | 1285 | 1111               | clinical isolate, biotype 1                                      | Ahmed A <i>et al.</i> 2012                                       |
| 315-A       | [GenBank:AFDI000000000] | 13        | 1.65             | 1290 | 1116               | clinical isolate                                                 | Nelson KE <i>et al.</i> 2010 (HMP)                               |
| 409-05      | [GenBank:NC_013721.1]   | 1         | 1.62             | 1258 | 1089               | isolated from the vagina of a healthy individual                 | Nelson KE <i>et al.</i> 2010 (HMP), Yeoman CJ <i>et al.</i> 2010 |
| 5.Jan       | [GenBank:ADAN000000000] | 94        | 1.67             | 1335 | 1054               | isolated from a healthy vagina                                   | Harwich MD Jr <i>et al.</i> 2010                                 |
| 55152       | [GenBank:ADEQ000000000] | 25        | 1.64             | 1298 | 1075               | clinical isolate, biotype 3                                      | Ahmed A <i>et al.</i> 2012                                       |
| 6119V5      | [GenBank:ADEW000000000] | 12        | 1.50             | 1172 | 1120               | isolated from the vagina of an asymptomatic patient, biotype 7   | Ahmed A <i>et al.</i> 2012                                       |
| 6420B       | [GenBank:ADEP000000000] | 14        | 1.49             | 1142 | 1134               | isolated from the vagina of an asymptomatic patient, biotype 2 * | Ahmed A <i>et al.</i> 2012                                       |

|           |                        |     |      |      |      |                                                                  |                                                                     |
|-----------|------------------------|-----|------|------|------|------------------------------------------------------------------|---------------------------------------------------------------------|
| 6420LIT   | [GenBank:ADEO00000000] | 3   | 0.54 | 369  | 1294 | isolated from the vagina of an asymptomatic patient, biotype 2 * | Ahmed A <i>et al.</i> 2012                                          |
| 75712     | [GenBank:ADEM00000000] | 3   | 1.67 | 1312 | 1100 | isolated from the vagina of an asymptomatic patient, biotype 1   | Ahmed A <i>et al.</i> 2012                                          |
| AMD       | [GenBank:ADAM00000000] | 117 | 1.61 | 1313 | 1043 | isolated from the vagina of a woman with BV                      | Harwich MD Jr <i>et al.</i> 2010<br>Nelson KE <i>et al.</i> 2010    |
| ATCC14019 | [GenBank:NC_014644.1]  | 1   | 1.67 | 1365 | 1066 | isolated from the vaginal secretions of a BV patient             | (HMP), Yeoman CJ <i>et al.</i> 2010<br>Nelson KE <i>et al.</i> 2010 |
| HMP9231   | [GenBank:NC_017456.1]  | 1   | 1.73 | 1317 | 1106 | isolated from the oral cavity                                    | (HMP)<br>Nelson KE <i>et al.</i> 2010                               |
| JCP7275   | [GenBank:ATJS00000000] | 202 | 1.56 | 1428 | 971  | vaginal isolate                                                  | (HMP)<br>Nelson KE <i>et al.</i> 2010                               |
| JCP7276   | [GenBank:ATJR00000000] | 179 | 1.66 | 1486 | 993  | vaginal isolate                                                  | (HMP)<br>Nelson KE <i>et al.</i> 2010                               |
| JCP7659   | [GenBank:ATJQ00000000] | 214 | 1.53 | 1439 | 950  | vaginal isolate                                                  | (HMP)<br>Nelson KE <i>et al.</i> 2010                               |
| JCP7672   | [GenBank:ATJP00000000] | 169 | 1.60 | 1396 | 1021 | vaginal isolate                                                  | (HMP)<br>Nelson KE <i>et al.</i> 2010                               |
| JCP7719   | [GenBank:ATJO00000000] | 185 | 1.56 | 1485 | 935  | vaginal isolate                                                  | (HMP)<br>Nelson KE <i>et al.</i> 2010                               |
| JCP8017A  | [GenBank:ATJN00000000] | 187 | 1.61 | 1515 | 944  | vaginal isolate                                                  | (HMP)<br>Nelson KE <i>et al.</i> 2010                               |
| JCP8017B  | [GenBank:ATJM00000000] | 187 | 1.60 | 1517 | 941  | vaginal isolate                                                  | (HMP)<br>Nelson KE <i>et al.</i> 2010                               |
| JCP8066   | [GenBank:ATJL00000000] | 197 | 1.52 | 1407 | 961  | vaginal isolate                                                  | (HMP)                                                               |
| JCP8070   | [GenBank:ATJK00000000] | 173 | 1.48 | 1366 | 963  | vaginal isolate                                                  | Nelson KE <i>et al.</i> 2010                                        |

|          |                         |     |      |      |     |                 |                                       |
|----------|-------------------------|-----|------|------|-----|-----------------|---------------------------------------|
| JCP8108  | [GenBank:ATJJ000000000] | 176 | 1.66 | 1516 | 977 | vaginal isolate | (HMP)<br>Nelson KE <i>et al.</i> 2010 |
| JCP8151A | [GenBank:ATJI000000000] | 189 | 1.56 | 1452 | 955 | vaginal isolate | (HMP)<br>Nelson KE <i>et al.</i> 2010 |
| JCP8151B | [GenBank:ATJH000000000] | 185 | 1.55 | 1459 | 952 | vaginal isolate | (HMP)<br>Nelson KE <i>et al.</i> 2010 |
| JCP8481A | [GenBank:ATJG000000000] | 204 | 1.57 | 1482 | 926 | vaginal isolate | (HMP)<br>Nelson KE <i>et al.</i> 2010 |
| JCP8481B | [GenBank:ATJF000000000] | 180 | 1.57 | 1431 | 958 | vaginal isolate | (HMP)<br>Nelson KE <i>et al.</i> 2010 |
| JCP8522  | [GenBank:ATJE000000000] | 191 | 1.47 | 1365 | 964 | vaginal isolate | (HMP)<br>Nelson KE <i>et al.</i> 2010 |

\* isolated from the same patient  
^ isolated from the same patient

## REFERENCES

- Ahmed A, Earl J, Retchless A, Hillier SL, Rabe LK, Cherpes TL, Powell E, Janto B, Eutsey R, Hiller NL, Boissy R, Dahlgren ME, Hall BG, Costerton JW, Post JC, Hu FZ, Ehrlich GD: Comparative genomic analyses of 17 clinical isolates of *Gardnerella vaginalis* provide evidence of multiple genetically isolated clades consistent with subspeciation into genovars. *J Bacteriol.* 2012, 94(15):3922-37.
- Harwich MD Jr, Alves JM, Buck GA, Strauss JF, Patterson JL, Oki AT, Girerd PH, Jefferson KK: Drawing the line between commensal and pathogenic *Gardnerella vaginalis* through genome analysis and virulence studies. *BMC Genomics* 2010, 11:375.
- Nelson KE, Weinstock GM, Highlander SK, Worley KC, Creasy HH, Wortman JR, Rusch DB, Mitreva M, Sodergren E, Chinwalla AT, Feldgarden M, Gevers D, Haas BJ, Madupu R, Ward DV, Birren BW, Gibbs RA, Methe B, Petrosino JF, Strausberg RL, Sutton GG, White OR, Wilson RK, Durkin S, Giglio MG, Gujja S, Howarth C, Kodira CD, Kyrpides N, Mehta T, Muzny DM, Pearson M, Pepin K, Pati A, Qin X, Yandava C, Zeng Q, Zhang L, Berlin AM, Chen L, Hepburn TA, Johnson J, McCorrison J, Miller J, Minx P, Nusbaum C, Russ C, Sykes SM, Tomlinson CM, Young S, Warren WC, Badger J, Crabtree J, Markowitz VM, Orvis J, Cree A, Ferriera S, Fulton LL, Fulton RS, Gillis M, Hemphill LD, Joshi V, Kovar C, Torralba M, Wetterstrand KA, Abouelleil A, Wollam AM, Buhay CJ, Ding Y, Dugan S, FitzGerald MG, Holder M, Hostetler J, Clifton SW, Allen-Vercoe E, Earl AM, Farmer CN, Liolios K, Surette MG, Xu Q, Pohl C, Wilczek-Boney K, Zhu D: A catalog of reference genomes from the human microbiome. *Science* 2010, 328(5981):994-999.
- Yeoman CJ, Yildirim S, Thomas SM, Durkin AS, Torralba M, Sutton G, Buhay CJ, Ding Y, Dugan-Rocha SP, Muzny DM, Qin X, Gibbs RA, Leigh SR, Stumpf R, White BA, Highlander SK, Nelson KE, Wilson BA: Comparative genomics of *Gardnerella vaginalis* strains reveals substantial differences in metabolic and virulence potential. *PLoS One.* 2010, 26;5(8):e12411.
