# Supplementary material for: Comparative genomics of Lactobacillus crispatus suggests novel mechanisms for the competitive exclusion of Gardnerella vaginalis
Source: PubMed Central journal article supplement (PMC4300991; doi:10.1186/1471-2164-15-1070), 2014-12-05
Supplement: 12864_2014_6771_MOESM2_ESM.pdf [file 12864_2014_6771_MOESM2_ESM.pdf]

| Species                          | Strain    | Accession              |
|----------------------------------|-----------|------------------------|
| <i>Lactobacillus acidophilus</i> | 30SC      | [GenBank:NC_015214]    |
| <i>Lactobacillus acidophilus</i> | ATCC 4796 | [GenBank:GG669567]     |
| <i>Lactobacillus acidophilus</i> | NCFM      | [GenBank:NC_006814]    |
| <i>Lactobacillus helveticus</i>  | R0052     | [GenBank:NC_018528]    |
| <i>Lactobacillus helveticus</i>  | H10       | [GenBank:NC_017467]    |
| <i>Lactobacillus helveticus</i>  | DPC 4571  | [GenBank:NC_010080]    |
| <i>Lactobacillus helveticus</i>  | DSM 20075 | [GenBank:GG700753]     |
| <i>Lactobacillus helveticus</i>  | MTCC 5463 | [GenBank:AEYL01000001] |
| <i>Bacillus subtilis</i>         | 168       | [GenBank:NC_000964]    |
