# Supplementary material for: Comparative genomics of Lactobacillus crispatus suggests novel mechanisms for the competitive exclusion of Gardnerella vaginalis
Source: PubMed Central journal article supplement (PMC4300991; doi:10.1186/1471-2164-15-1070), 2014-12-05

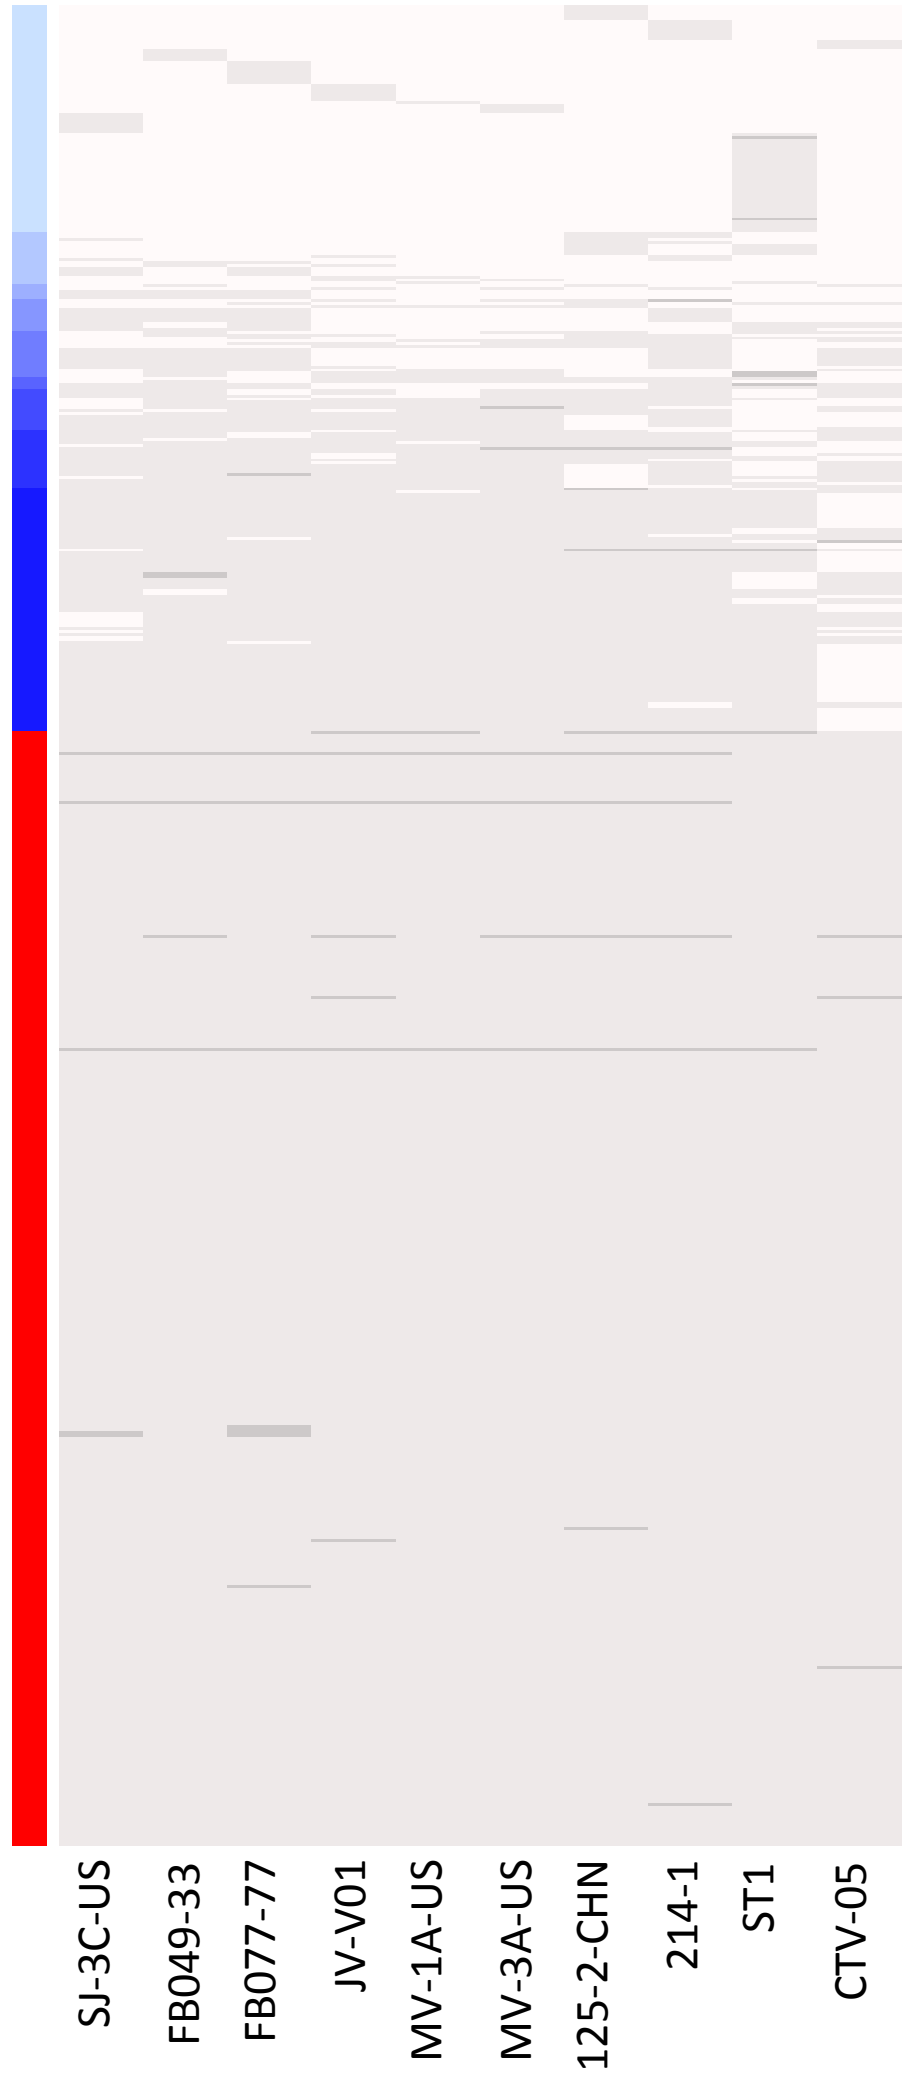

SJ-3C-US

FB049-33

FB077-77

JV-V01

MV-1A-US

MV-3A-US

125-2-CHN

214-1

ST1

CTV-05

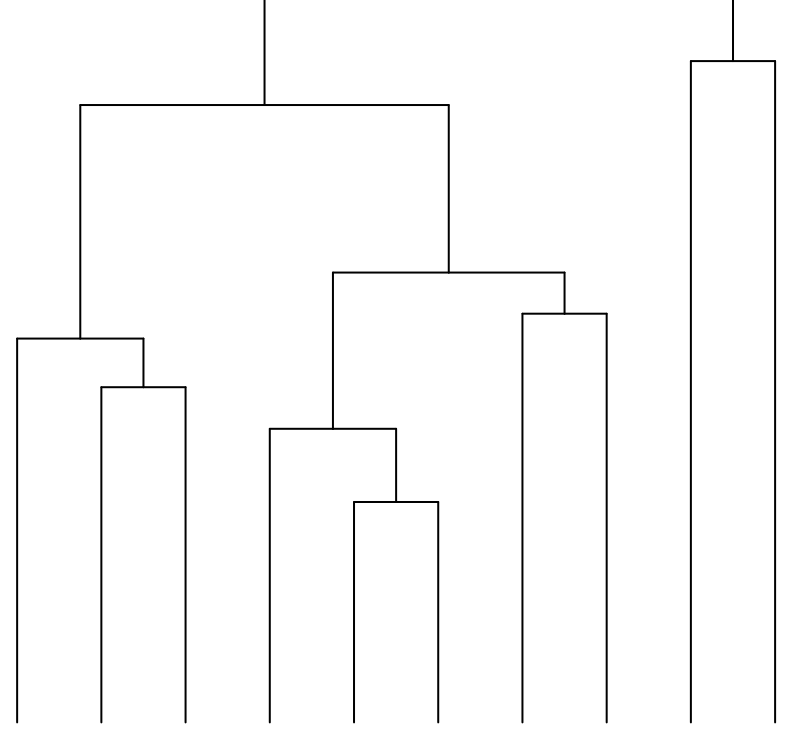

Supplement: 12864_2014_6771_MOESM8_ESM.pdf [file 12864_2014_6771_MOESM8_ESM.pdf]
