# Supplementary material for: Comparative genomics of Lactobacillus crispatus suggests novel mechanisms for the competitive exclusion of Gardnerella vaginalis
Source: PubMed Central journal article supplement (PMC4300991; doi:10.1186/1471-2164-15-1070), 2014-12-05
Supplement: 12864_2014_6771_MOESM10_ESM.pdf [file 12864_2014_6771_MOESM10_ESM.pdf]

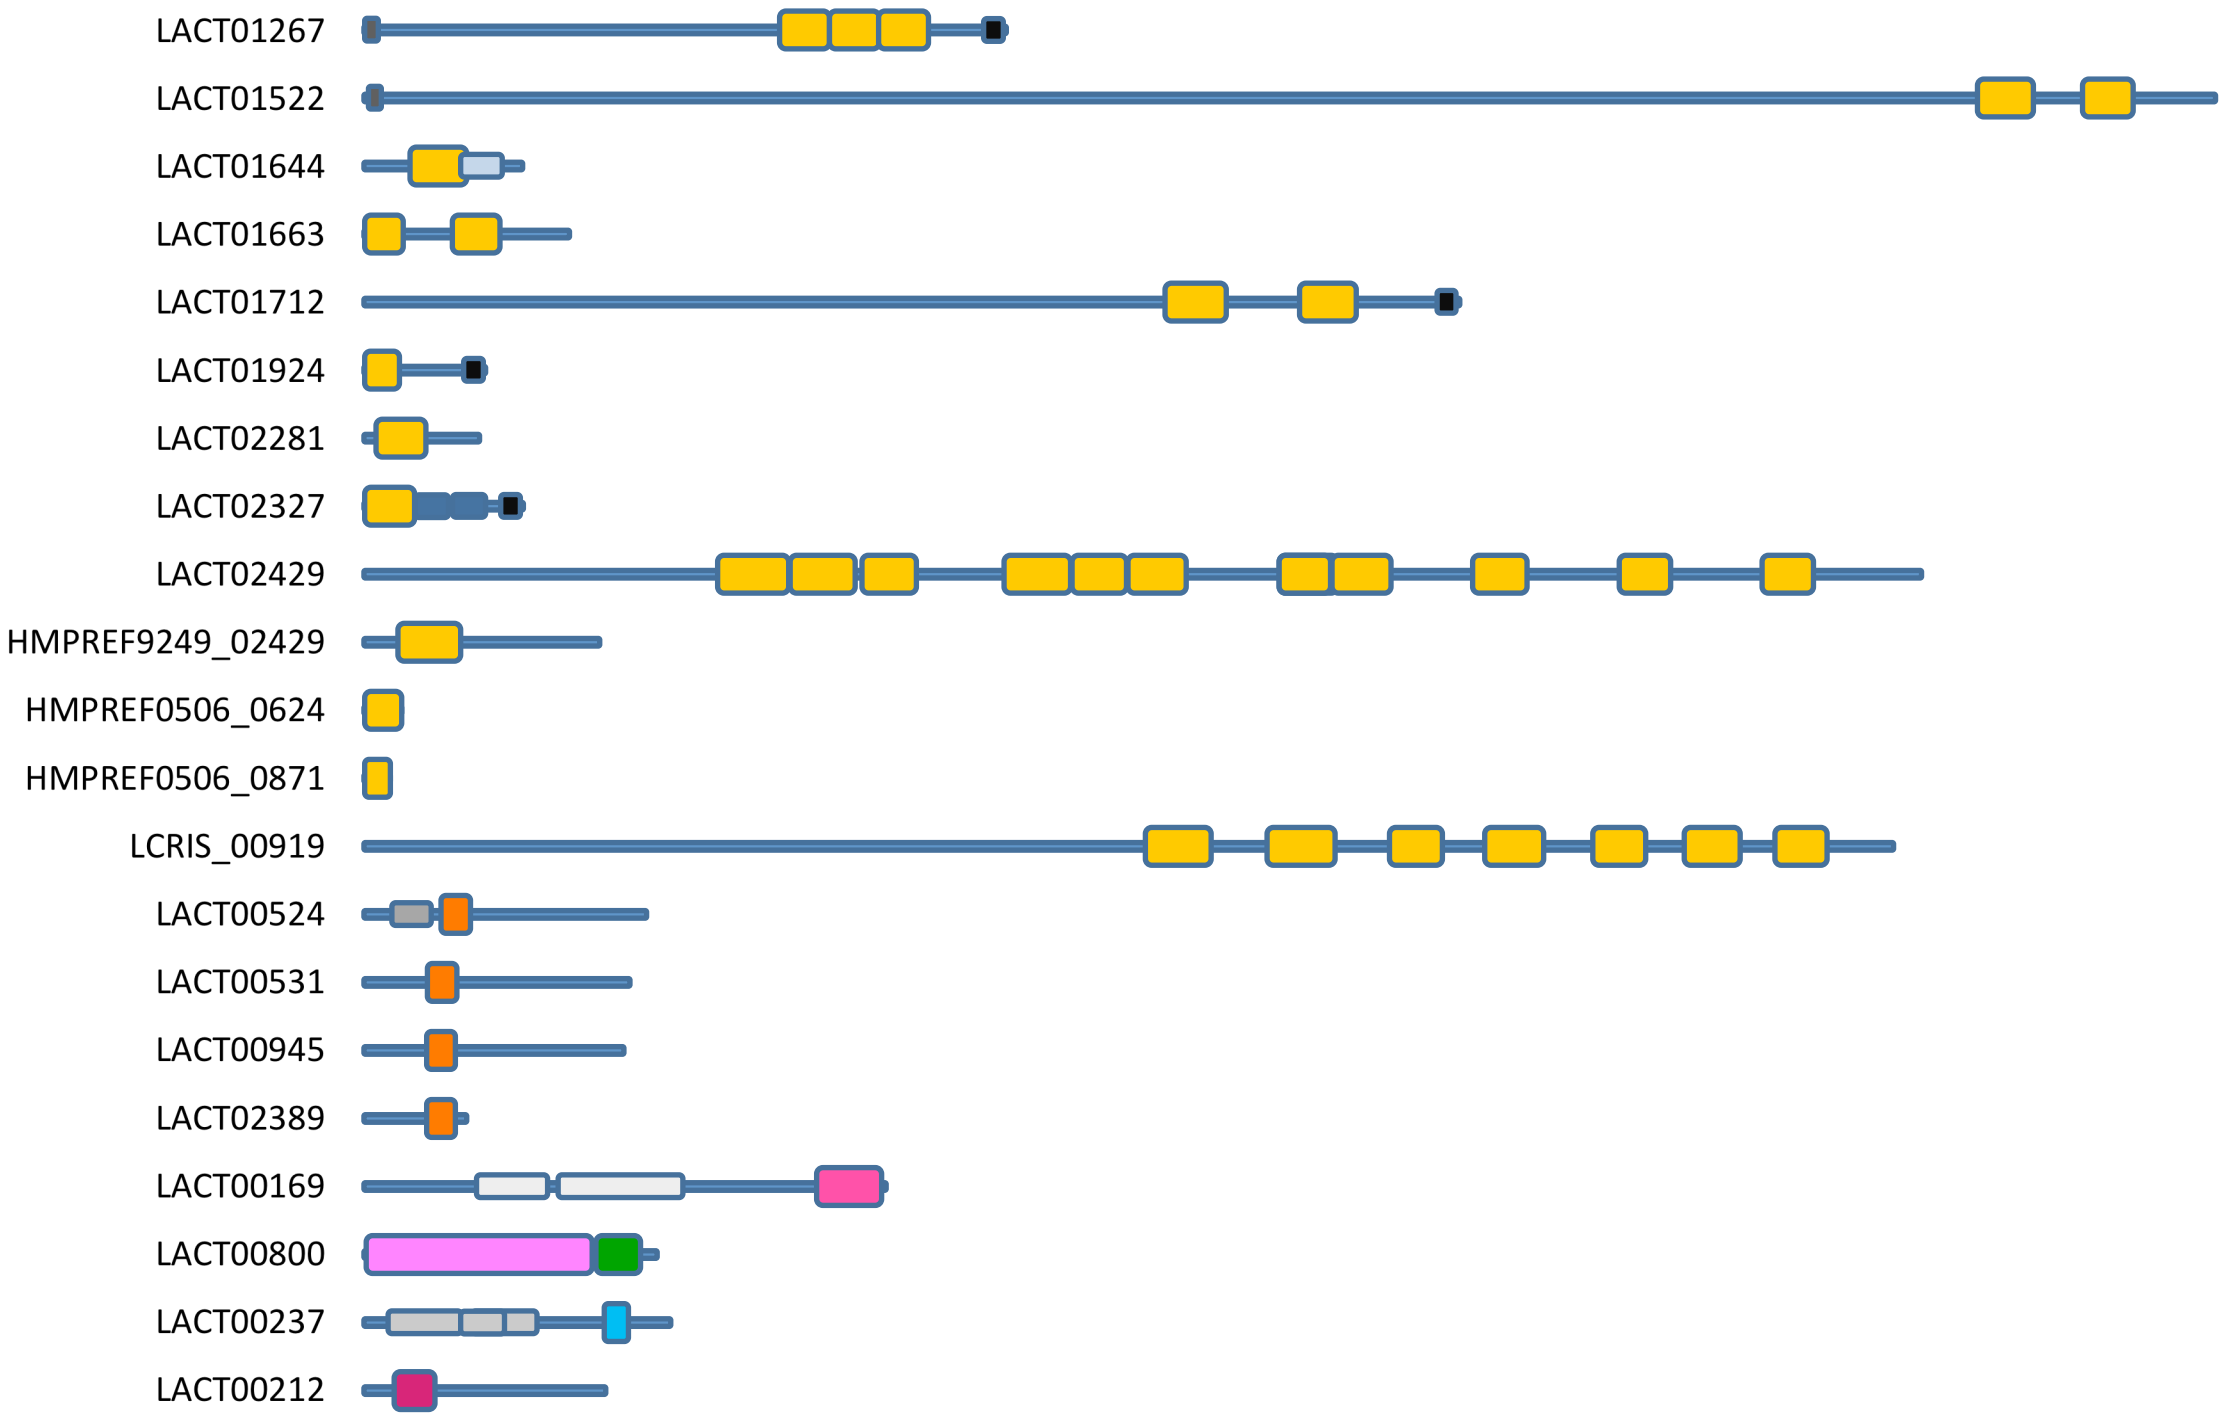

Adhesion domains

- F5\_F8\_type\_C
- fn3
- FIVAR
- Big\_3
- FbpA
- DUF814
- MucBP

Non-adhesion domains

- Glyco\_hydro\_31
- SLAP
- SH3\_8
- Ysirk\_signal
- Gram\_pos\_anchor
- PSDC
- Rib
